# Supplementary material for: Environmental fungi and bacteria facilitate lecithin decomposition and the transformation of phosphorus to apatite
Source: PubMed Central journal article supplement (PMC6814757; doi:10.1038/s41598-019-51804-7), 2019-10-25
Supplement: 41598_2019_51804_MOESM1_ESM.pdf [file 41598_2019_51804_MOESM1_ESM.pdf]

# **Environmental fungi and bacteria facilitate lecithin decomposition and the transformation of phosphorus to apatite**

Chunkai Li <sup>a,1</sup>, Qisheng Li <sup>a</sup>, Zhipeng Wang <sup>a</sup>, Guanning Ji <sup>a</sup>, He Zhao <sup>a</sup>, Fei Gao <sup>a</sup>, Mu Su <sup>a</sup>, Jiaguo Jiao <sup>a,b,\*</sup>, Zhen Li <sup>a,c,\*</sup>, Huixin Li <sup>a,b</sup>

<sup>a</sup> College of Resources and Environmental Sciences, Nanjing Agricultural University, Nanjing, Jiangsu 210095, China

<sup>b</sup> Jiangsu Collaborative Innovation Center for Solid Organic Waste Resource Utilization, Nanjing, Jiangsu 210014, China

<sup>c</sup> Jiangsu Provincial Key Lab for Organic Solid Waste Utilization, Nanjing Agricultural University, Nanjing, 210095, China.

## **Corresponding to:**

### **Dr. Jiaguo Jiao**

College of Resources and Environmental Sciences,  
Nanjing Agricultural University,  
Nanjing, Jiangsu, 210095, China.

Tel. +86 13814049541; Fax: +86(25) 84399827

E-mail: jiaguojiao@njau.edu.cn

### **Dr. Zhen Li**

Jiangsu Key Lab for Organic Solid Waste Utilization,  
Nanjing Agricultural University,  
Nanjing, Jiangsu, 210095, China.

Tel. +86(25) 84399827; Fax: +86(25) 84399827

E-mail: lizhen@njau.edu.cn

### ***Precipitate characterization by scanning electron microscopy analysis***

The precipitates that formed from supernatants prepared from *A. niger* and *Acinetobacter* sp. cultures containing  $\text{CaCl}_2$  were subjected to crystalline morphological analysis by SEM. SEM was performed in a Carl Zeiss Supra 55 system with an acceleration voltage of 5 kV. The samples were sputter coated with gold for 5 min prior to SEM analysis. Semiquantitative analysis (collection time: 90 s) was performed using an Oxford Aztec X-Max 150 energy dispersive spectrometer.

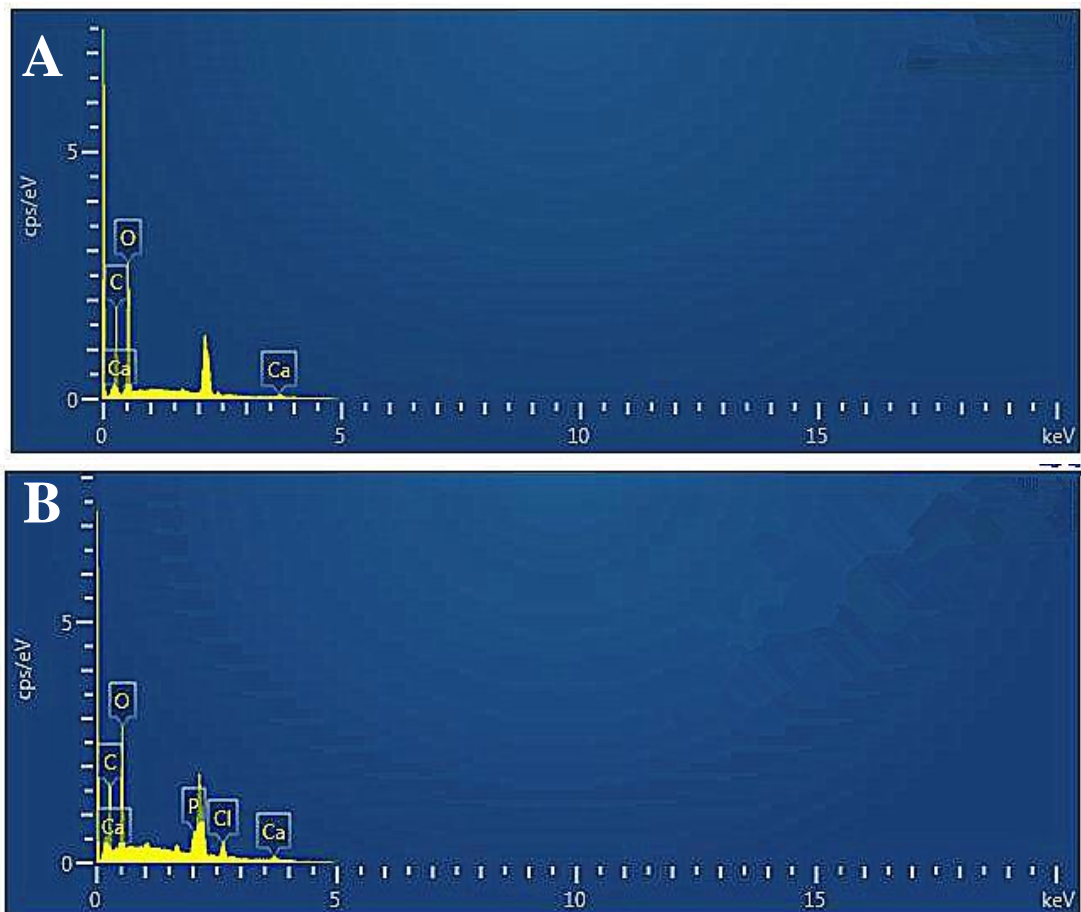

**Supplementary Fig. 1.** Elemental composition of precipitates formed in selected areas by adding  $\text{CaCl}_2$  in *A. niger* (A) and *Acinetobacter* sp. (B), respectively.
